# Supplementary material
Source: PubMed Central journal article supplement (PMC2839310)

Supplementary Figure 1.

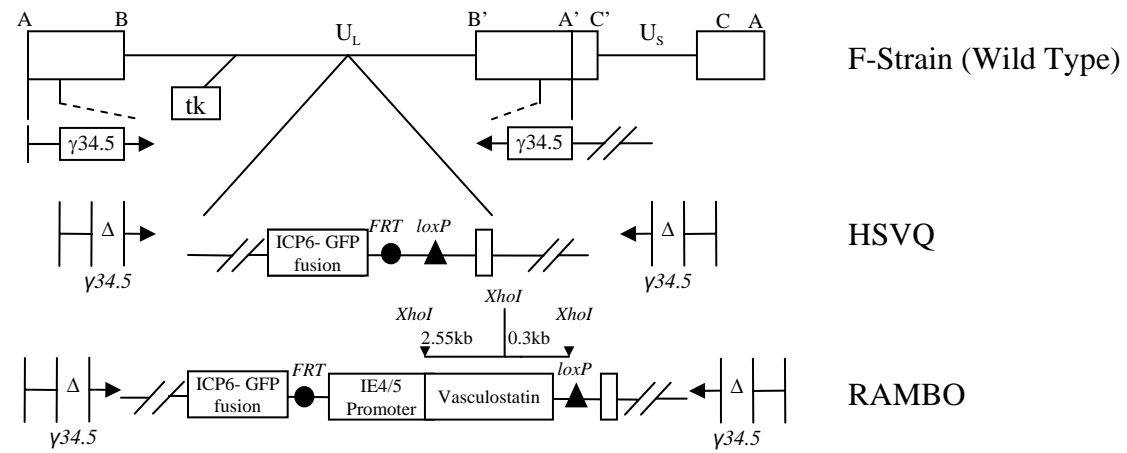

Supplement: mt2009232x1.pdf [file mt2009232x1.pdf]

Supplementary Figure 2.

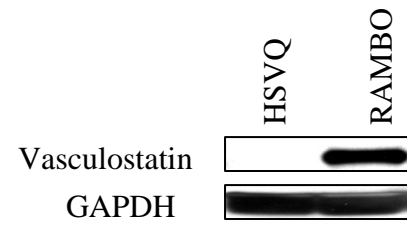

Supplement: mt2009232x2.pdf [file mt2009232x2.pdf]

Supplementary Figure 3.

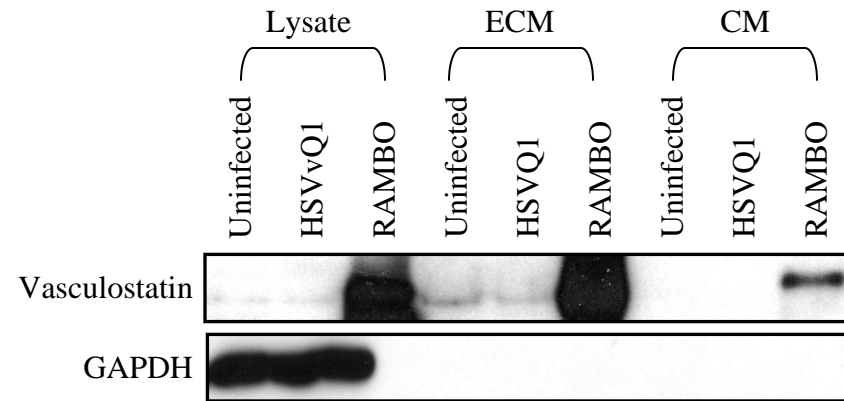

Supplement: mt2009232x3.pdf [file mt2009232x3.pdf]
